# Supplementary material
Source: PubMed Central journal article supplement (PMC8436446)
Supplement: 12913_2021_6171_MOESM1_ESM.pdf [file 12913_2021_6171_MOESM1_ESM.pdf]

# Is South Africa closing the health gaps between districts? Monitoring progress towards universal health service coverage with routine facility data

Candy Day, Andy Gray, Annibale Cois, Noluthando Ndlovu, Naomi Massyn, Ties Boerma

## Additional File 1: Methodological details & additional results

|      |                                                                                                                                                    |   |
|------|----------------------------------------------------------------------------------------------------------------------------------------------------|---|
| 1.   | Methodological details .....                                                                                                                       | 1 |
| 1.1. | Comparison of surveys vs. routine indicators for family planning .....                                                                             | 1 |
| 1.2. | Smoothed estimates of pneumonia deaths in children under 5 years as a proportion of pneumonia separations under 5 years in health facilities ..... | 2 |
| 1.3. | Comparison of alternative indicators and sources for prevention of cardiovascular disease .....                                                    | 4 |
| 1.4. | Estimation of treatment coverage for diabetes .....                                                                                                | 4 |
| 1.5. | Estimation of proportion of population not covered by medical insurance .....                                                                      | 6 |
| 2.   | Additional Results .....                                                                                                                           | 7 |

### 1. Methodological details

#### 1.1. Comparison of surveys vs. routine indicators for family planning

Figure A1: Comparison of survey and routine indicators for family planning

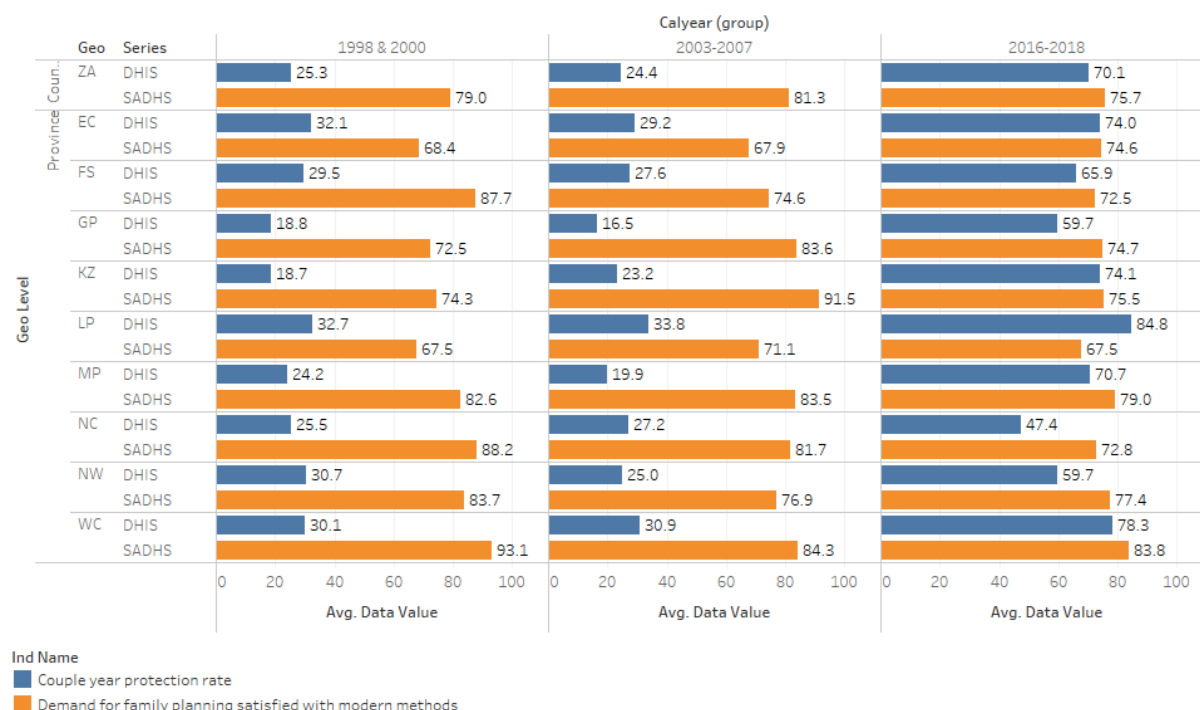

DHIS = District Health Information System

SADHS = South African Demographic and Health Survey

ZA = South Africa; EC = Eastern Cape; FS = Free State; GP = Gauteng Province; KZ = KwaZulu-Natal; LP = Limpopo Province; MP = Mpumalanga; NC = Northern Cape; NW = North West; WC = Western Cape

## 1.2. Smoothed estimates of pneumonia deaths in children under 5 years as a proportion of pneumonia separations under 5 years in health facilities

All available data on case fatality rate for pneumonia in children < 5 years were extracted from the DHIS for the period between 2005 and 2018. For each district, a 'raw' value for the indicator was calculated as the proportion of deaths over the total number of facility separations (defined as the sum of the number of deaths + the number of discharges + the number of transfers to other facilities) in the reference year.

Data were visually inspected for the presence of extreme outliers and implausible values, and as a result 4 values (> 10 times the average values for the district over the whole period) were excluded from the dataset.

A generalised additive log-log model with thin-plate splines was fit to the remaining values, separately for each district. The estimated model coefficients were used to generate a smoothed, consistent series of values for the indicator. The smoothed estimates are shown in Figure A2 (blue lines) together with the raw values (red squares).

Figure A2: Smoothed vs. raw estimates of case fatality ratio (CFR) for pneumonia in children < 5 years, by district

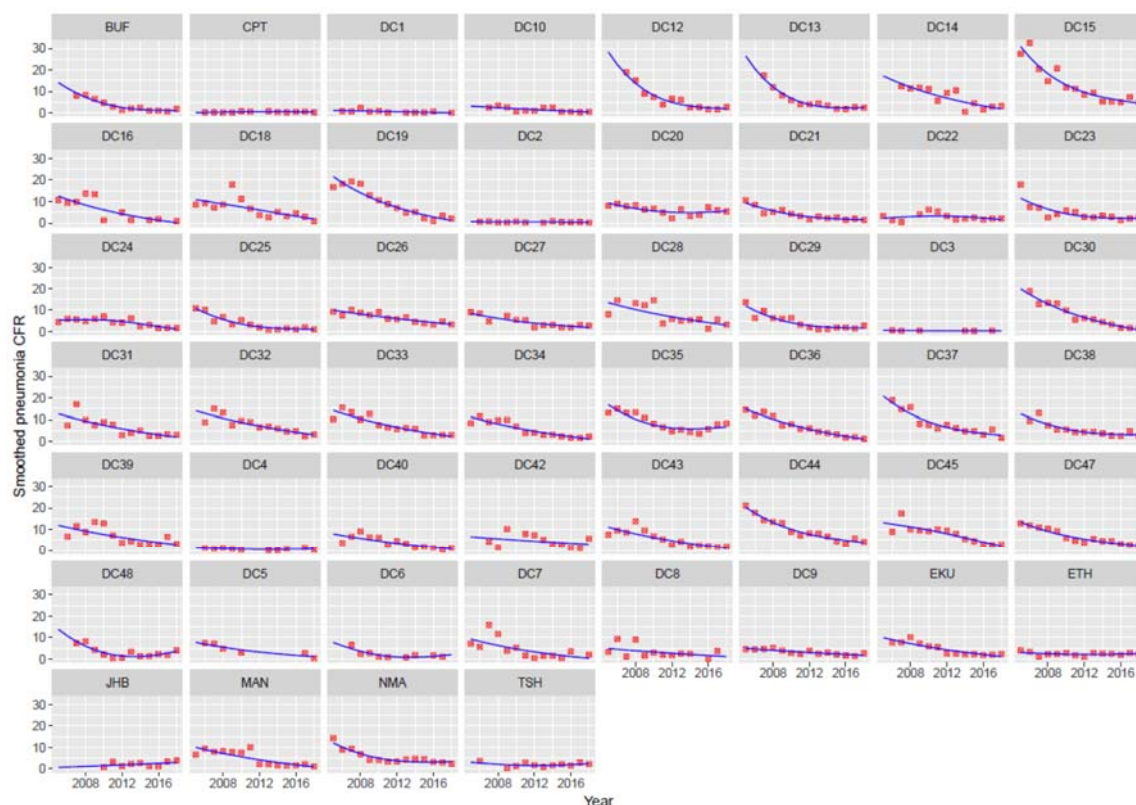

The smoothed estimates were rescaled according to the maximum observed value

$$index = \frac{maximum - original\ value}{maximum - minimum} \cdot 100$$

The results at district and province level are shown in Figure A3 and A4, respectively.

Figure A3: Smoothed vs. raw estimates of the UHC4 SCI indicator (Child treatment), by district

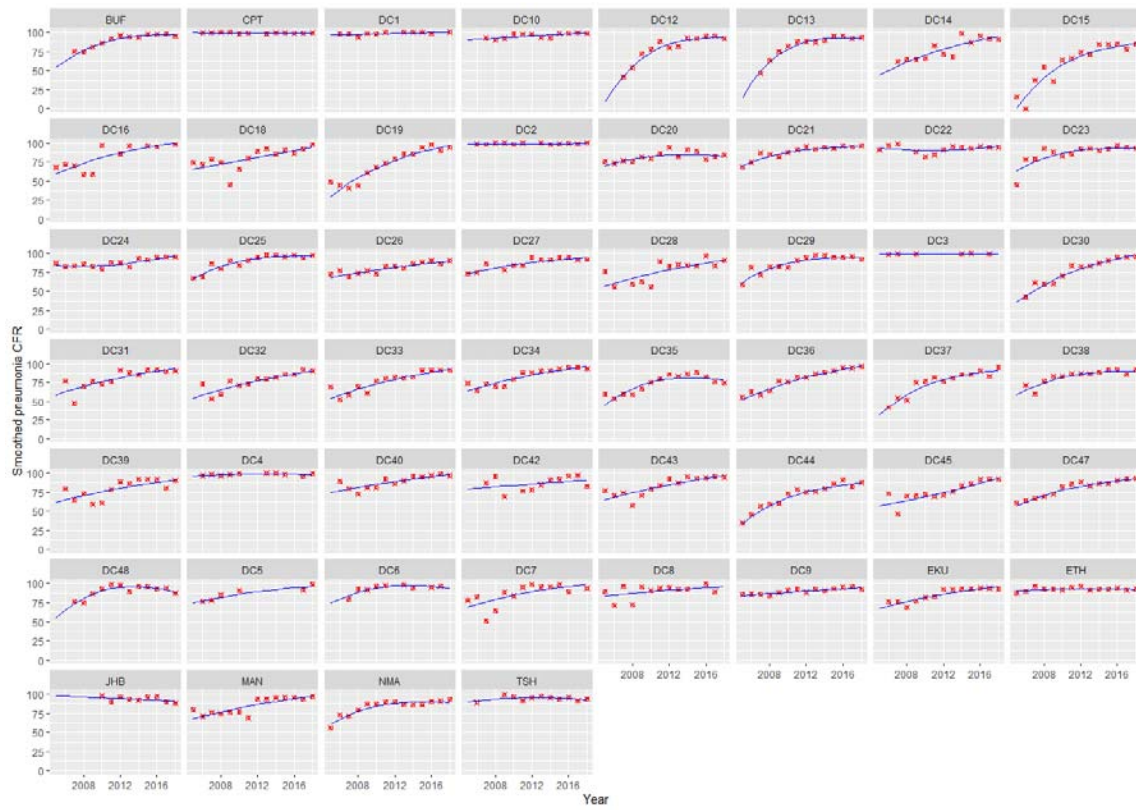

Figure A4: Smoothed vs. raw estimates of the UHC4 SCI indicator (Child treatment), by province

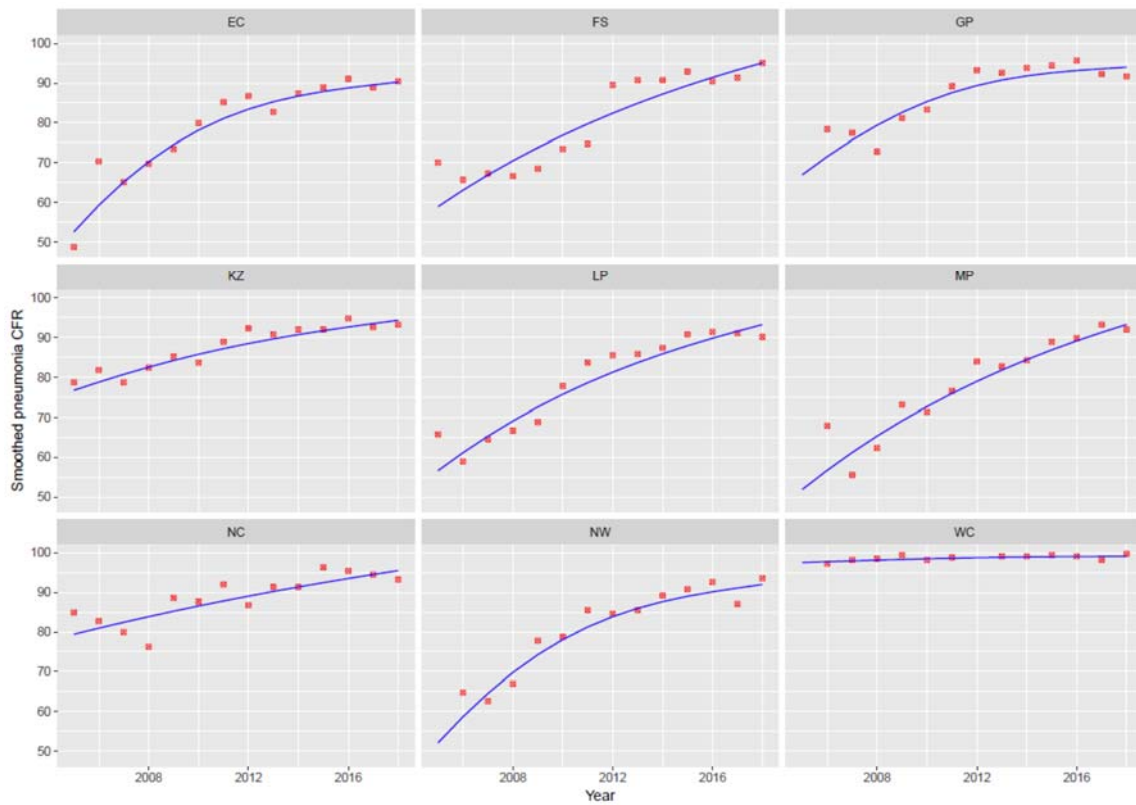

### 1.3. Comparison of alternative indicators and sources for prevention of cardiovascular disease

Figure A5: Comparison of alternative indicators and sources for prevention of cardiovascular disease, South Africa

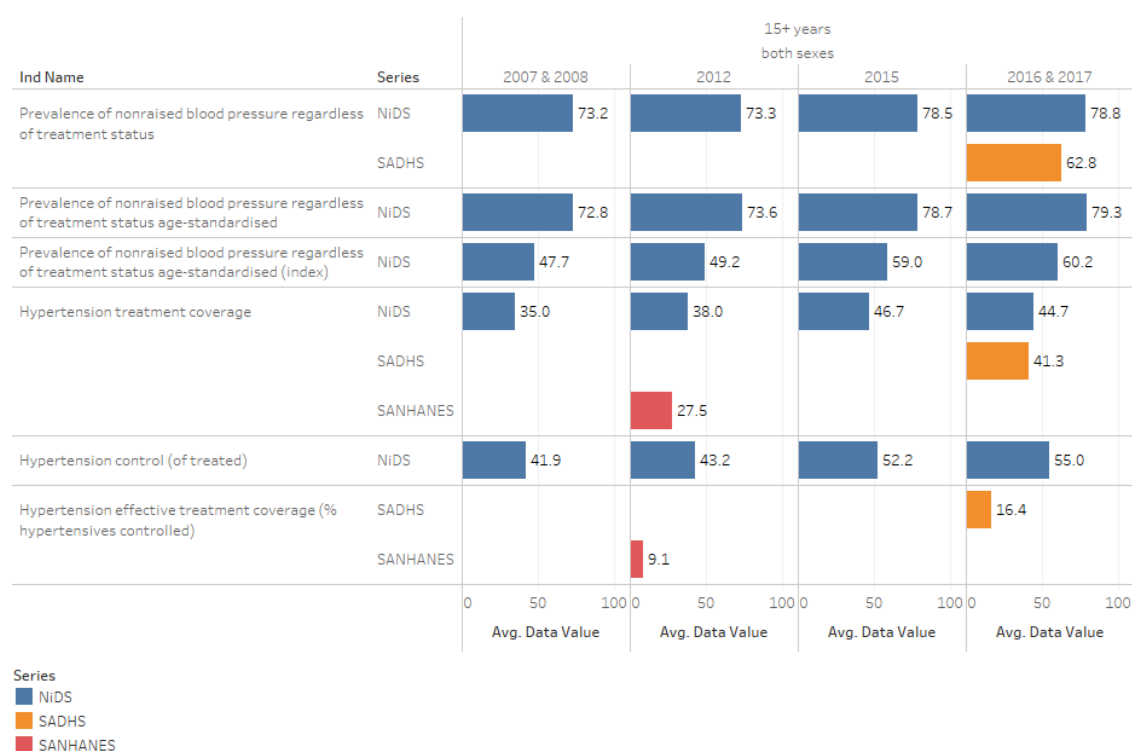

NiDS = National Income Dynamics Study  
 DHIS = District Health Information System  
 SADHS = South African Demographic and Health Survey

### 1.4. Estimation of treatment coverage for diabetes

Only a single national figure for diabetes treatment coverage has been reported for South Africa, in SANHANES 2012.<sup>1</sup> No published literature could be found that reported hypertension or diabetes treatment coverage indicators using health facility data, and the utility of current indicators is limited.<sup>2</sup>  
<sup>3</sup> Routine data on chronic disease visits and treatment initiations could potentially be combined with estimates of prevalence (from surveys) to fill this gap. The first review of all available studies on diabetes prevalence in SA is currently underway for the second National Burden of Disease Study, which should improve estimation of the denominator (population in need of treatment).<sup>4</sup>

For the purpose of our analysis, a modelled estimate of diabetes prevalence and treatment coverage per district and per year was instead generated for UHC10.

A machine learning algorithm was trained with data from SADHS 2016, which includes biomarkers allowing for a direct estimation of diabetes status, to predict individual probabilities of being diabetic from demographic (age, sex, ethnicity) and bio-behavioural (body mass index, waist circumference, current smoking) characteristics and self-reported previous diagnosis and use of medication.

To improve accuracy the model employs a combination of classification algorithms (namely Random Forest, SVM, Recursive Partitioning, Boosted Regression Model) and calculates the probabilities of being diabetics based on the set of predictors listed above as a weighted average of the probabilities predicted by the individual models, the weights being the estimated accuracy of each prediction (calculated by cross-validation).

Table A1 shows the estimates accuracy of the individual models.

Table A1: Accuracy of the four ML models used to predict diabetes status based on demographic and bio-behavioural predictors. Cross-validation estimates and 95% Confidence Intervals.

| Model                    | Accuracy [%] | 95% Confidence Interval |      |
|--------------------------|--------------|-------------------------|------|
|                          |              | lb                      | ub   |
| Random Forest            | 80.2         | 66.7                    | 90.0 |
| SVM                      | 76.5         | 61.1                    | 86.7 |
| Recursive Partitioning   | 77.7         | 63.3                    | 86.7 |
| Boosted Regression Model | 80.6         | 66.7                    | 90.0 |

lb, ub = upper and lower bounds of the 95% confidence interval.

Sensitivity and specificity of the overall procedure was also estimated by cross-validation. The results are shown in Table A2.

Table A2: Sensitivity and specificity ML models used to predict diabetes status based on demographic and bio-behavioural predictors. Cross-validation estimates and 95% Confidence Intervals.

|                          | Sensitivity [%] |      |      | Specificity [%] |      |       |
|--------------------------|-----------------|------|------|-----------------|------|-------|
|                          | estimate        | lb   | ub   | estimate        | lb   | ub    |
| Random Forest            | 60.7            | 30.0 | 80.0 | 90.0            | 80.0 | 100.0 |
| SVM                      | 60.3            | 30.0 | 80.0 | 84.6            | 70.0 | 100.0 |
| Recursive Partitioning   | 50.0            | 20.0 | 70.0 | 91.5            | 80.0 | 100.0 |
| Boosted Regression Model | 61.5            | 30.0 | 80.0 | 90.2            | 80.0 | 100.0 |

lb, ub = upper and lower bounds of the 95% confidence interval.

The model was applied by using as predictors demographic and bio-behavioural characteristics of the individuals sampled in the five waves of the NiDS survey to predict the individual probability of being diabetic. The predict probabilities were averaged taking into account the complex sampling scheme of each wave and the result considered an estimate of the prevalence of diabetes in the population for the respective wave.

To correct for the imperfect sensitivity and specificity of the predictive mode, the estimated prevalences were corrected with the formula:

$$p = \frac{\hat{p} + (Sp - 1)}{Se + (Sp - 1)}$$

The performance of the procedure was assessed by using random subsets of the SADHS datasets with different proportions of diabetics and comparing the model-predicted prevalences with the observed ones. An example result is shown in Figure A6.

Figure A6: Observed vs. model-predicted prevalences of diabetes in random subsets of the SADHS dataset.

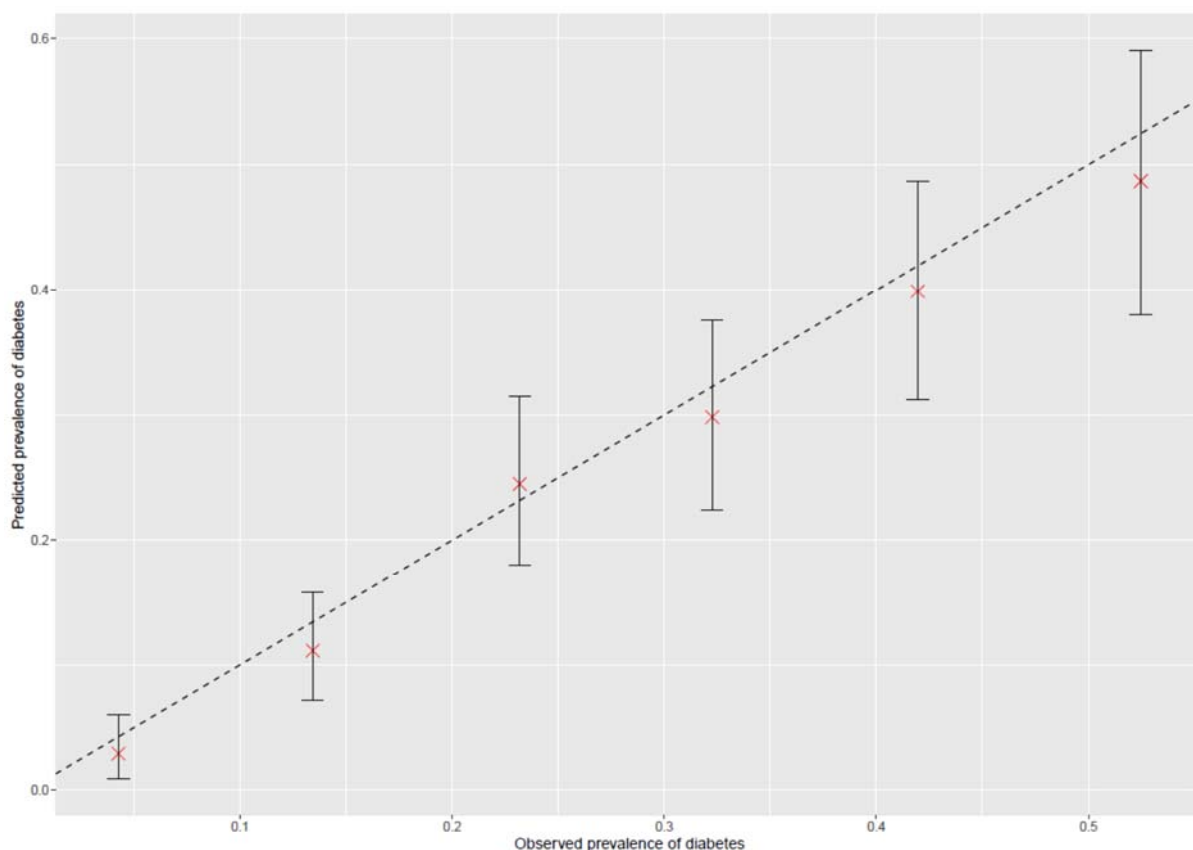

X = model-predicted prevalence of diabetes (and 95% Confidence Intervals).

The proportion of subjects on medication was directly estimated from self-reported data, and treatment coverage was calculated as the ratio between population proportion of treated and diabetes prevalence. A smooth variation over time was assumed for treatment coverage, and final annual estimates were obtained by thin-plate spline smoothing.

### 1.5. Estimation of proportion of population not covered by medical insurance

The proportion of the insured population per district was estimated by Insight Actuaries [<https://www.insight.co.za/>] using a small area model based on Census 2011, Community Survey 2016 and scaled using the General Household Survey 2018 and Council for Medical Schemes data. The predictors included gender of the household head, age of the household head, province, residence in a metropolitan municipality, income category, and number of household members. This estimate of medical schemes coverage was then used with the population time series in DHIS to calculate the uninsured population.<sup>5,6</sup>





## References

1. Stokes A, Berry KM, McHiza Z, Parker WA, Labadarios D, Chola L, et al. Prevalence and unmet need for diabetes care across the care continuum in a national sample of South African adults: Evidence from the SANHANES-1, 2011-2012. *PloS One*. 2017;12(10):e0184264. Epub 2017/10/03.
2. Day C, Groenewald P, Laubscher R, Chaudhry S, Van Schaik N, Bradshaw D. Monitoring of non-communicable diseases such as hypertension in South Africa: challenges for the post-2015 global development agenda. *S Afr Med J*. 2014;104(10):680-7. Epub 2014/11/05.
3. Cois A. 11. Non-communicable diseases. In: Massyn N, Peer N, Padarath A, Day C, editors, editors. *District Health Barometer 2016/17*. Durban: Health Systems Trust; 2017.
4. Pheiffer C, Pillay-van Wyk V, Joubert JD, Levitt N, Nglazi MD, Bradshaw D. The prevalence of type 2 diabetes in South Africa: a systematic review protocol. *BMJ Open*. 2018;8(7):e021029. Epub 2018/07/13.
5. Massyn N, Pillay Y, Padarath A, editors. *District Health Barometer 2017/18*. Durban: Health Systems Trust; 2018.
6. Massyn N, Barron P, Day C, Ndlovu N, Padarath A, editors. *District Health Barometer 2018/19*. Durban: Health Systems Trust; 2020.
